# Supplementary material for: Lithography-Free, Low-Cost Method for Improving Photodiode Performance by Etching Silicon Nanocones as Antireflection Layer
Source: Hindawi journal article supplement (doi:10.1155/2016/4019864), 2016-01-01
Supplement: f1 [file 4019864.f1.pdf]

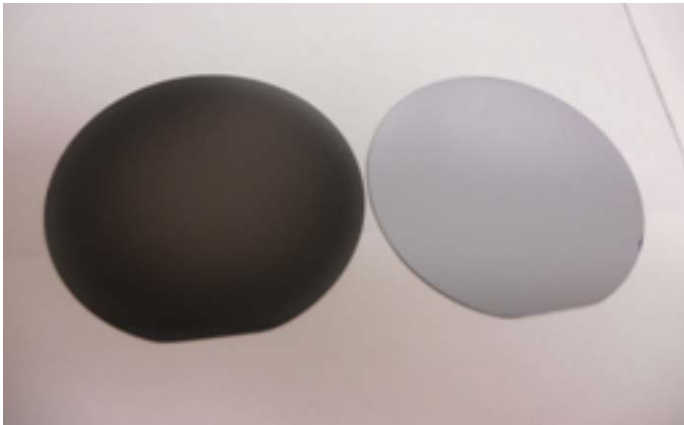

Wafer-level KOH textured black silicon wafer(l) and control(r)

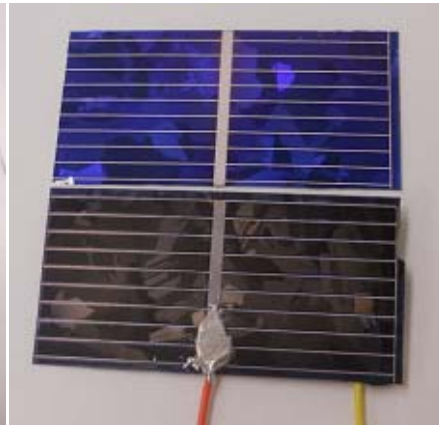

Silicon nitrate coated polycrystalline Si solar cell(top) and Blackened polycrystalline Si solar cell(bottom)

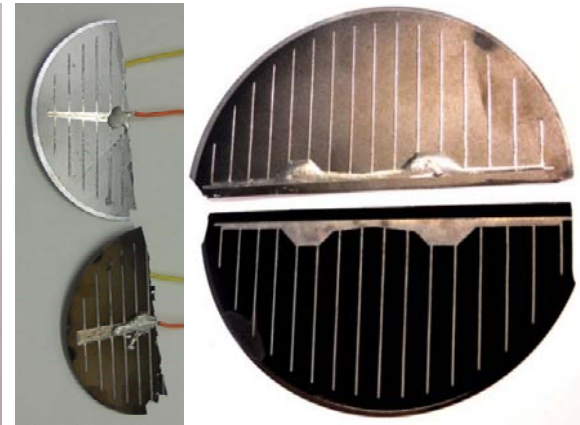

Blackened KOH textured single crystal Si solar cell(top) and control(bottom)
